# Supplementary material for: FinnGen provides genetic insights from a well-phenotyped isolated population
Source: PubMed Central journal article supplement (PMC9849126; doi:10.1038/s41586-022-05473-8), 2023-01-18

---

**Supplementary information**

---

**FinnGen provides genetic insights from a well-phenotyped isolated population**

---

In the format provided by the authors and unedited

# C3\_BREAST\_EXALLC

R2 (weighted): 0.84

Slope: 0.87

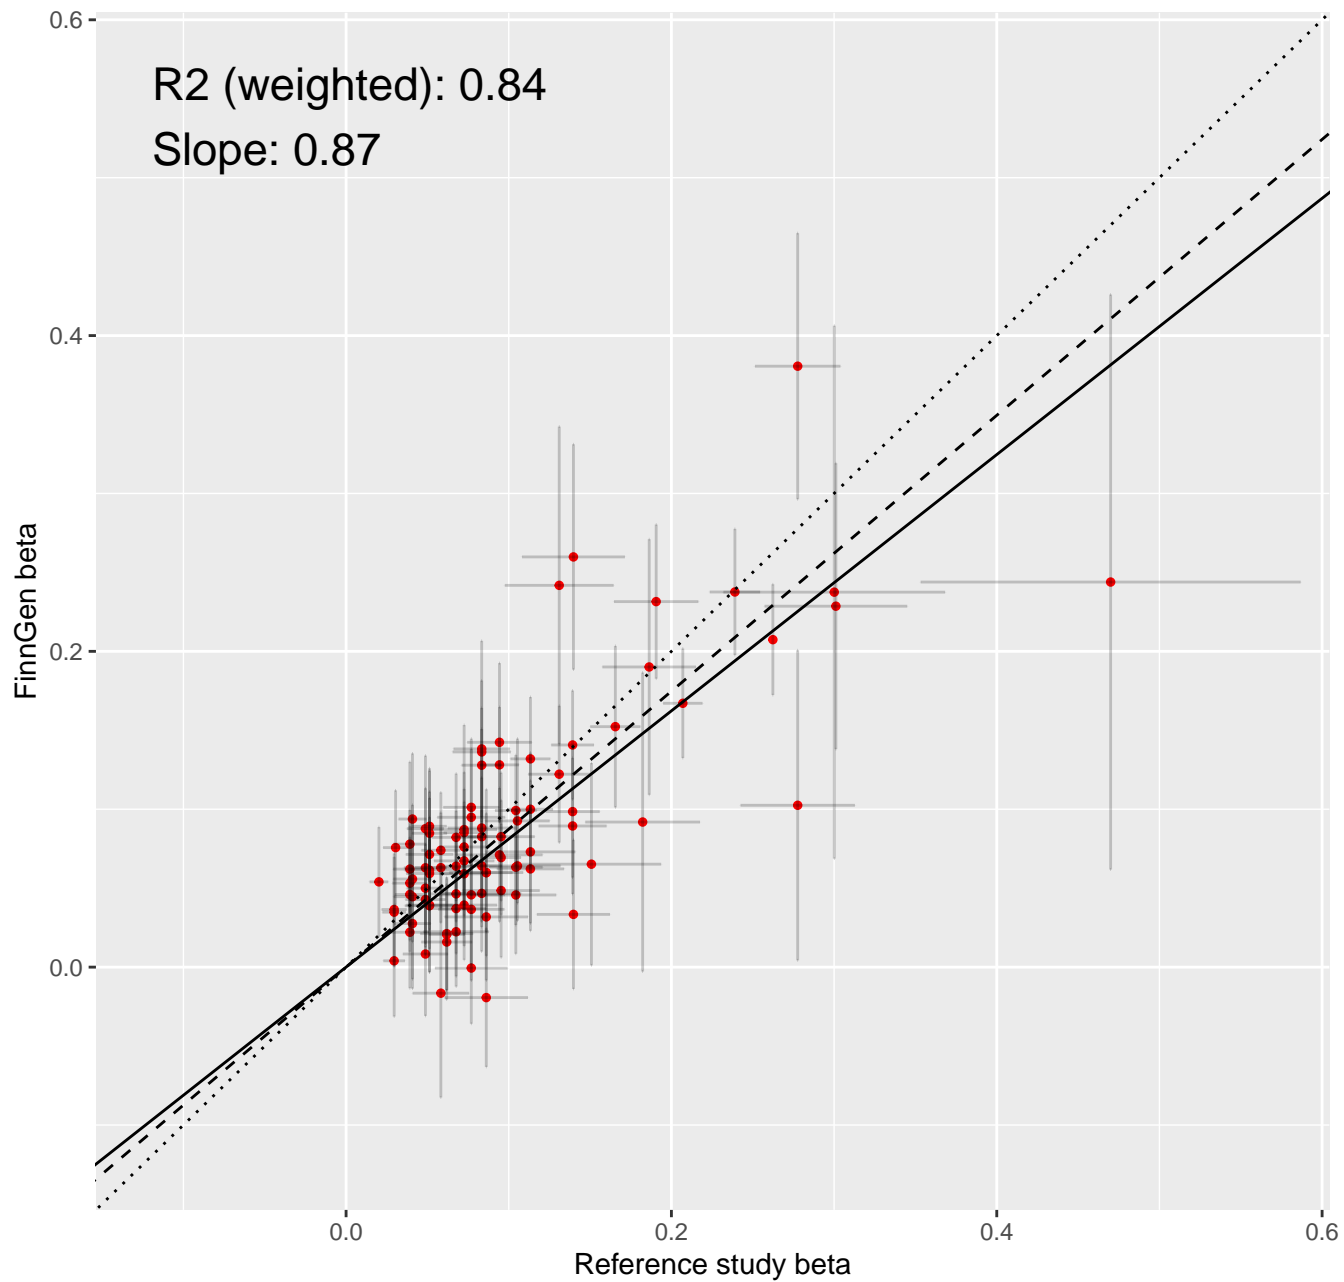

# C3\_PROSTATE\_EXALLC

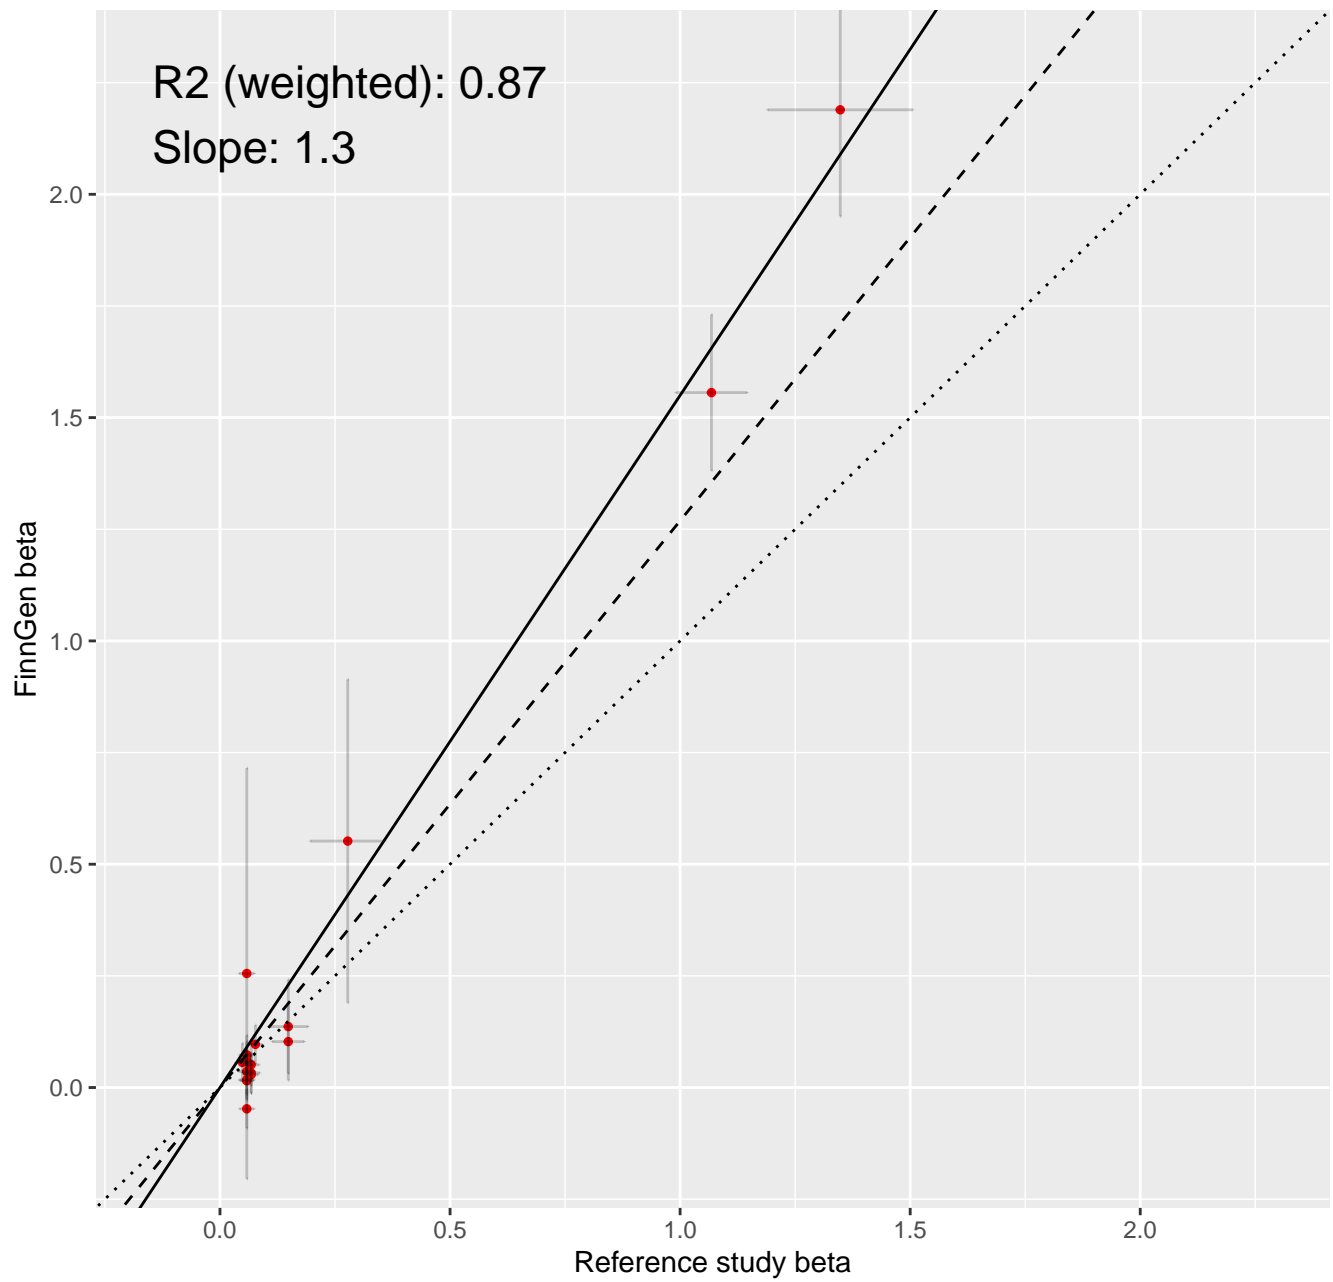

# G6\_AD\_WIDE

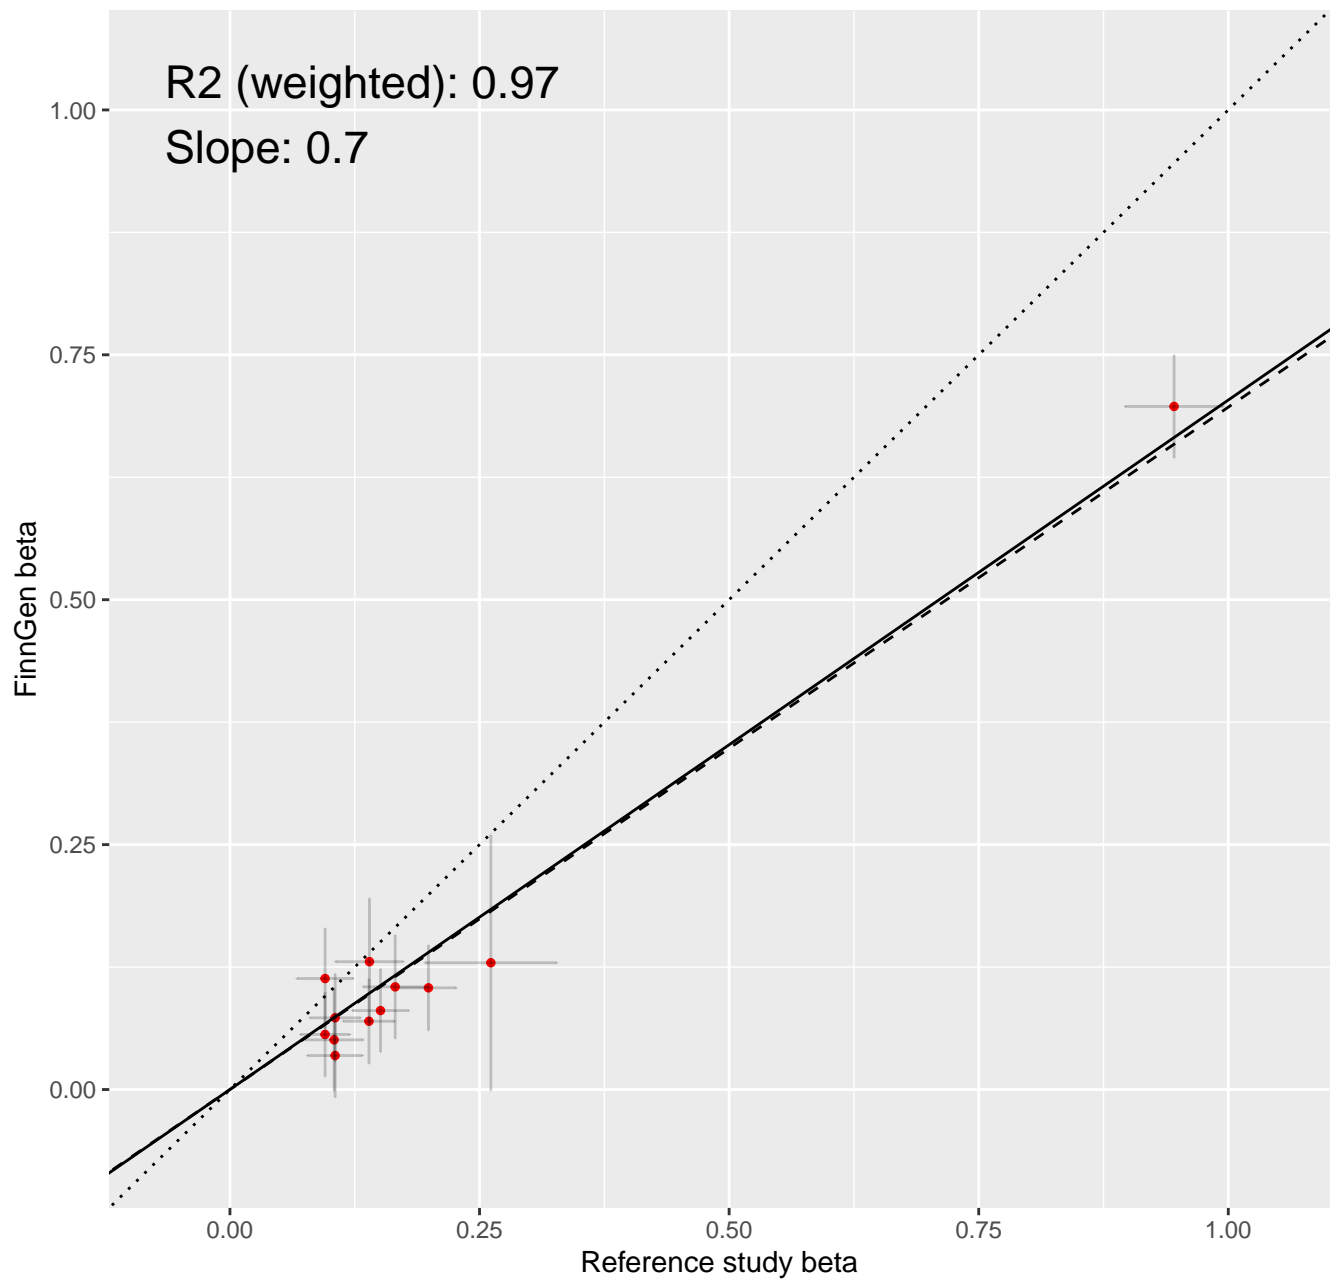

# H7\_AMD

R2 (weighted): 0.96

Slope: 0.65

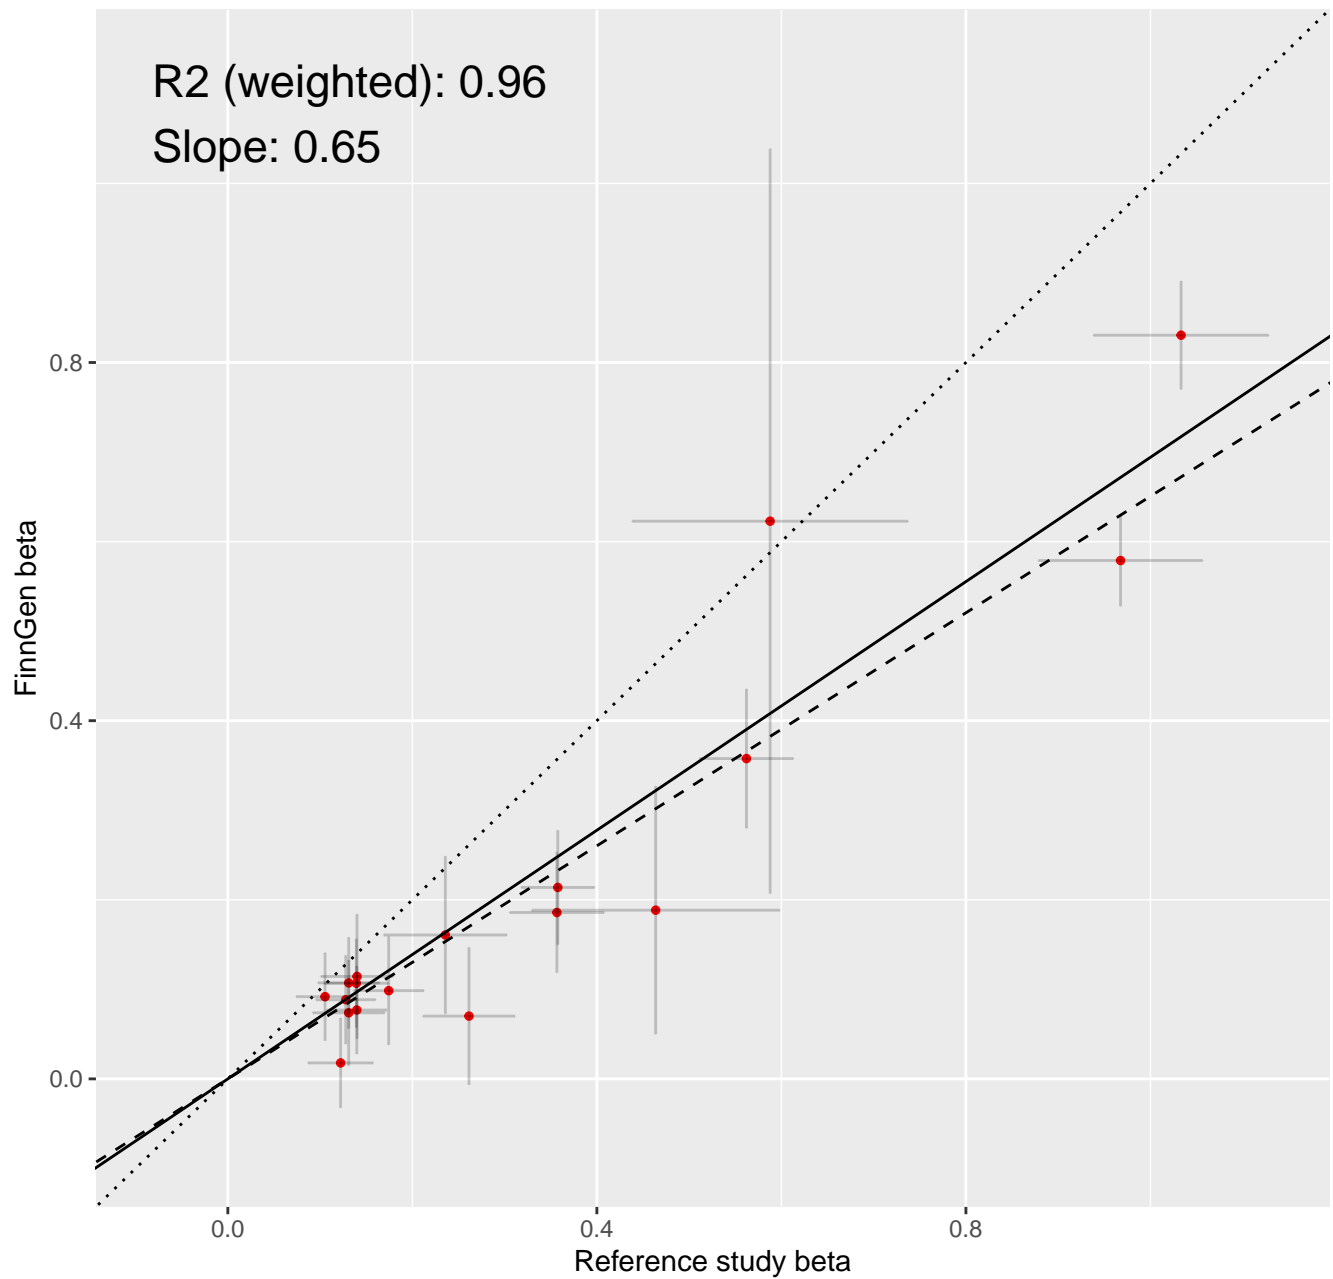

# H7\_GLAUCPRIMOPEN

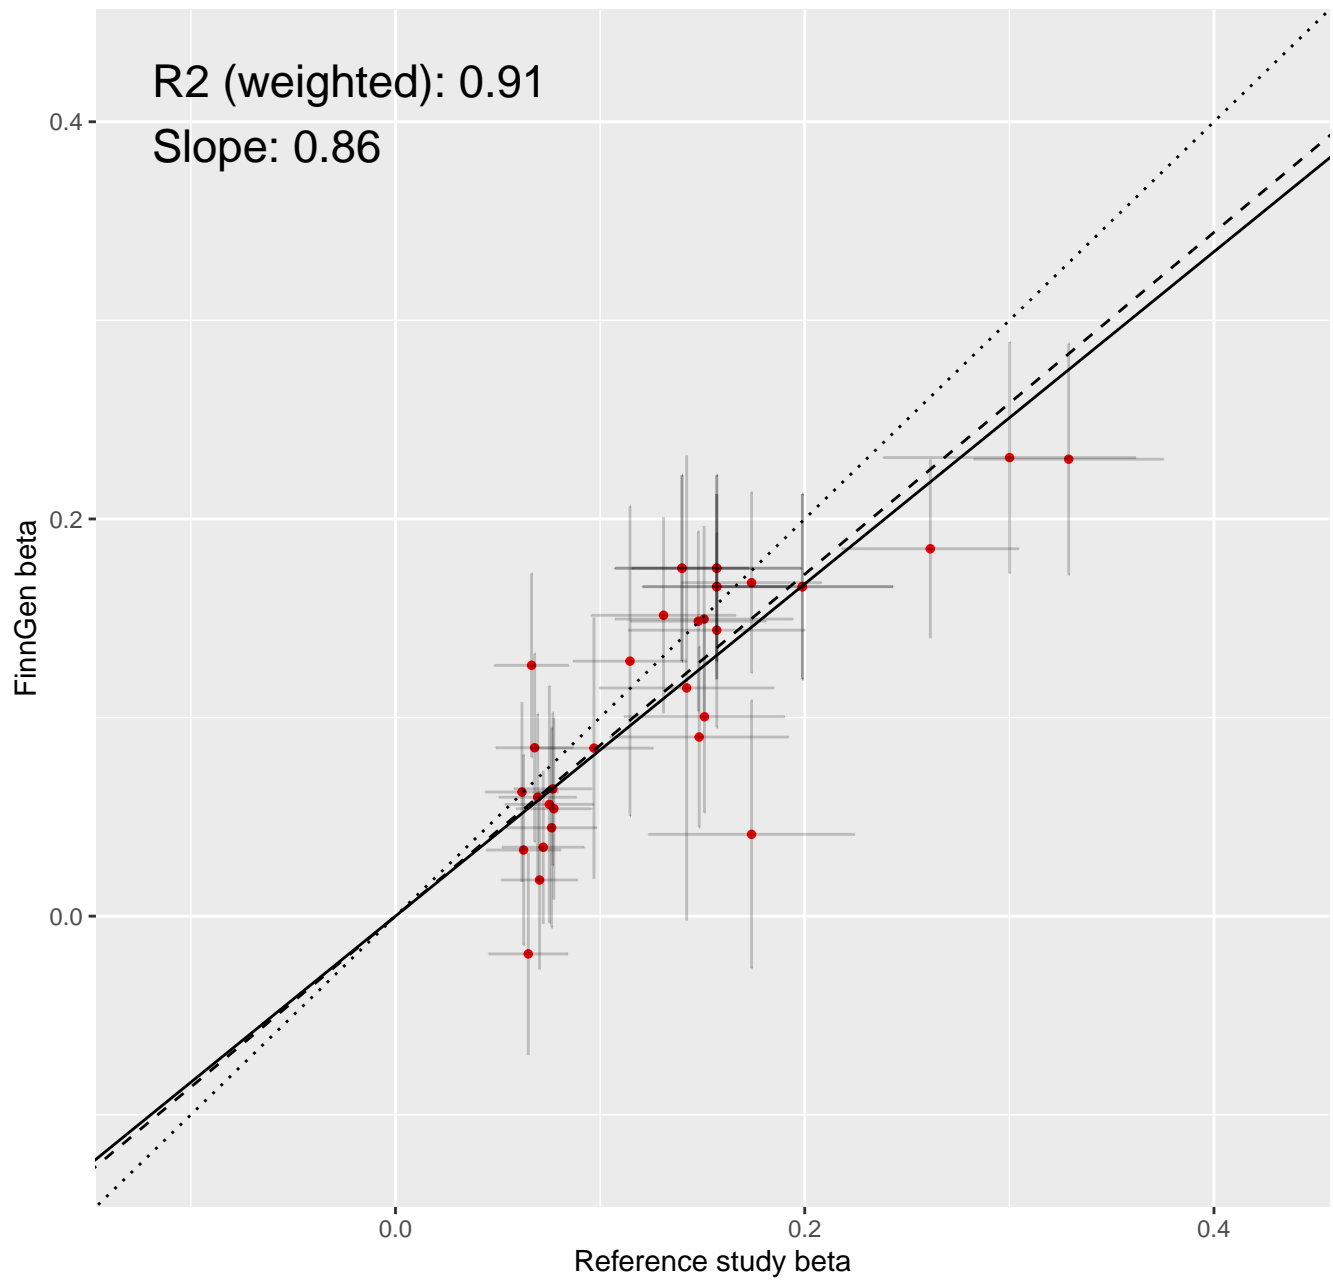

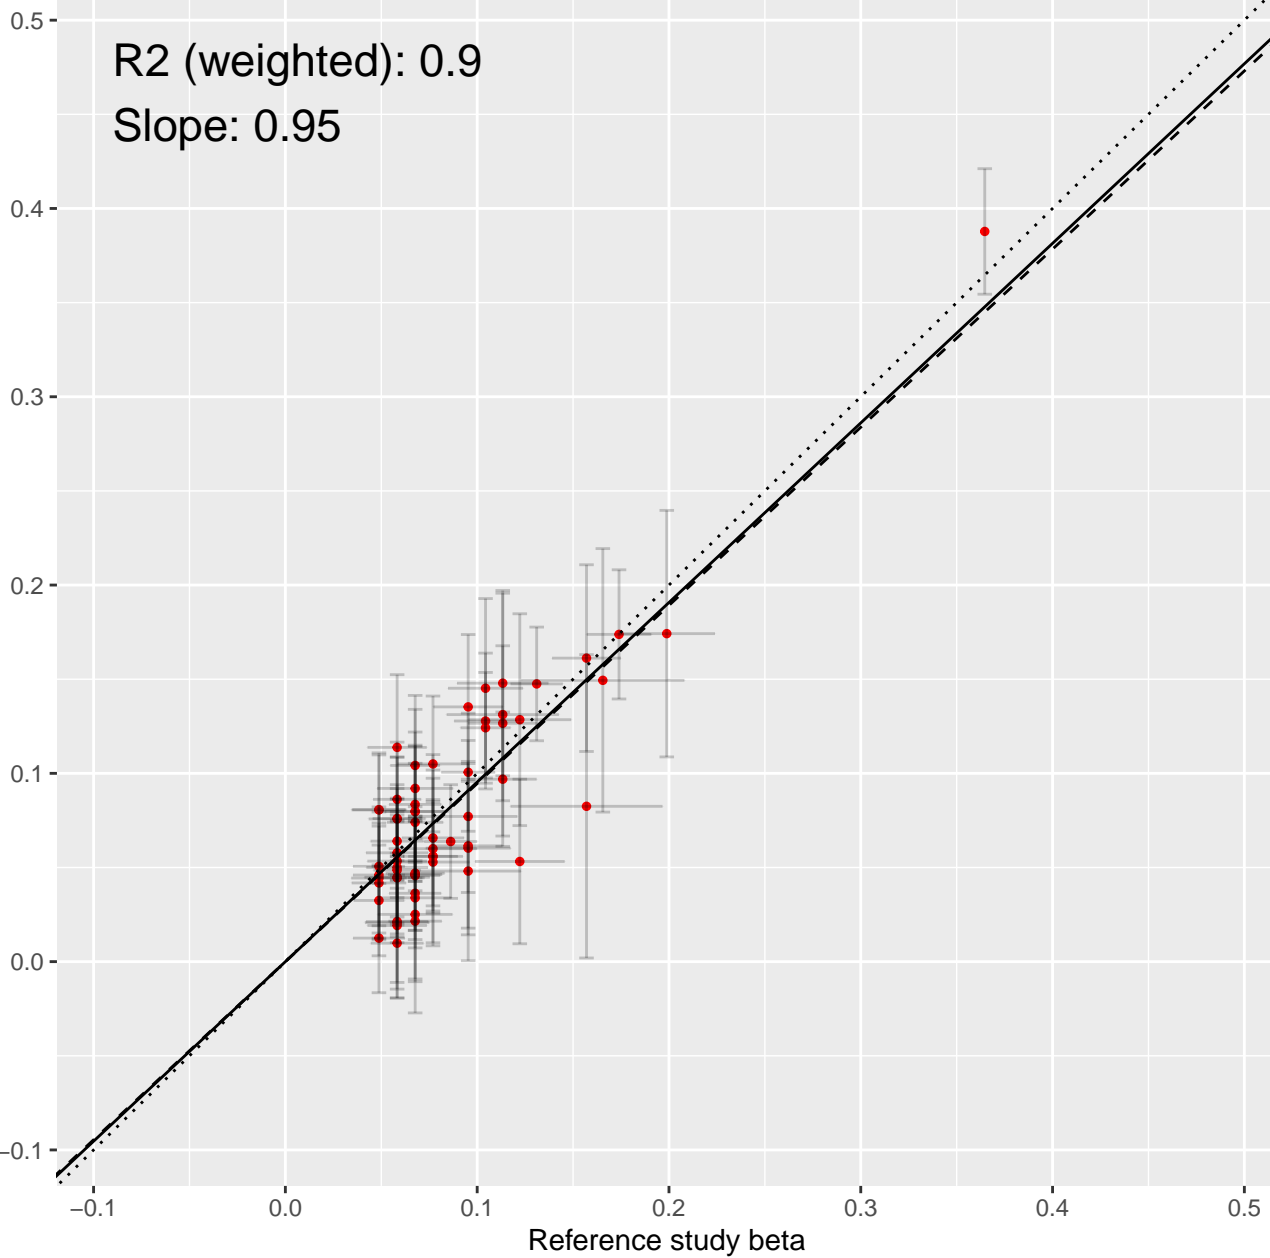

# I9\_MI\_STRICT

R2 (weighted): 0.95

Slope: 1.1

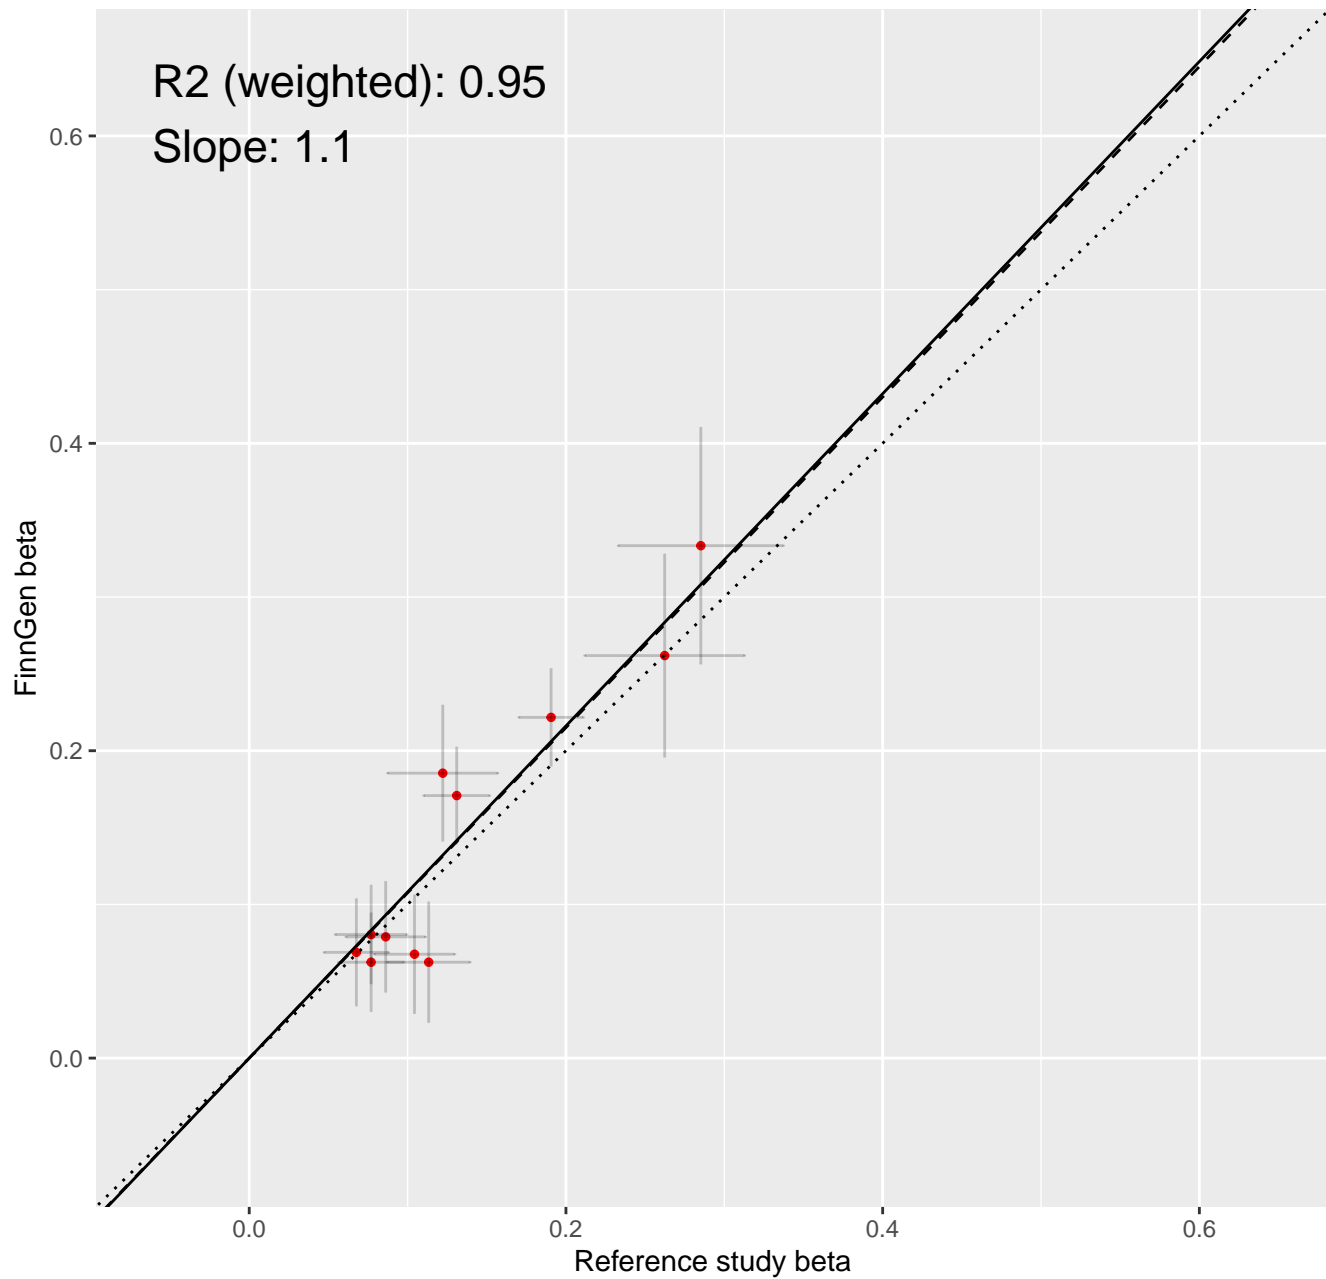



# K11\_IBD\_STRICT

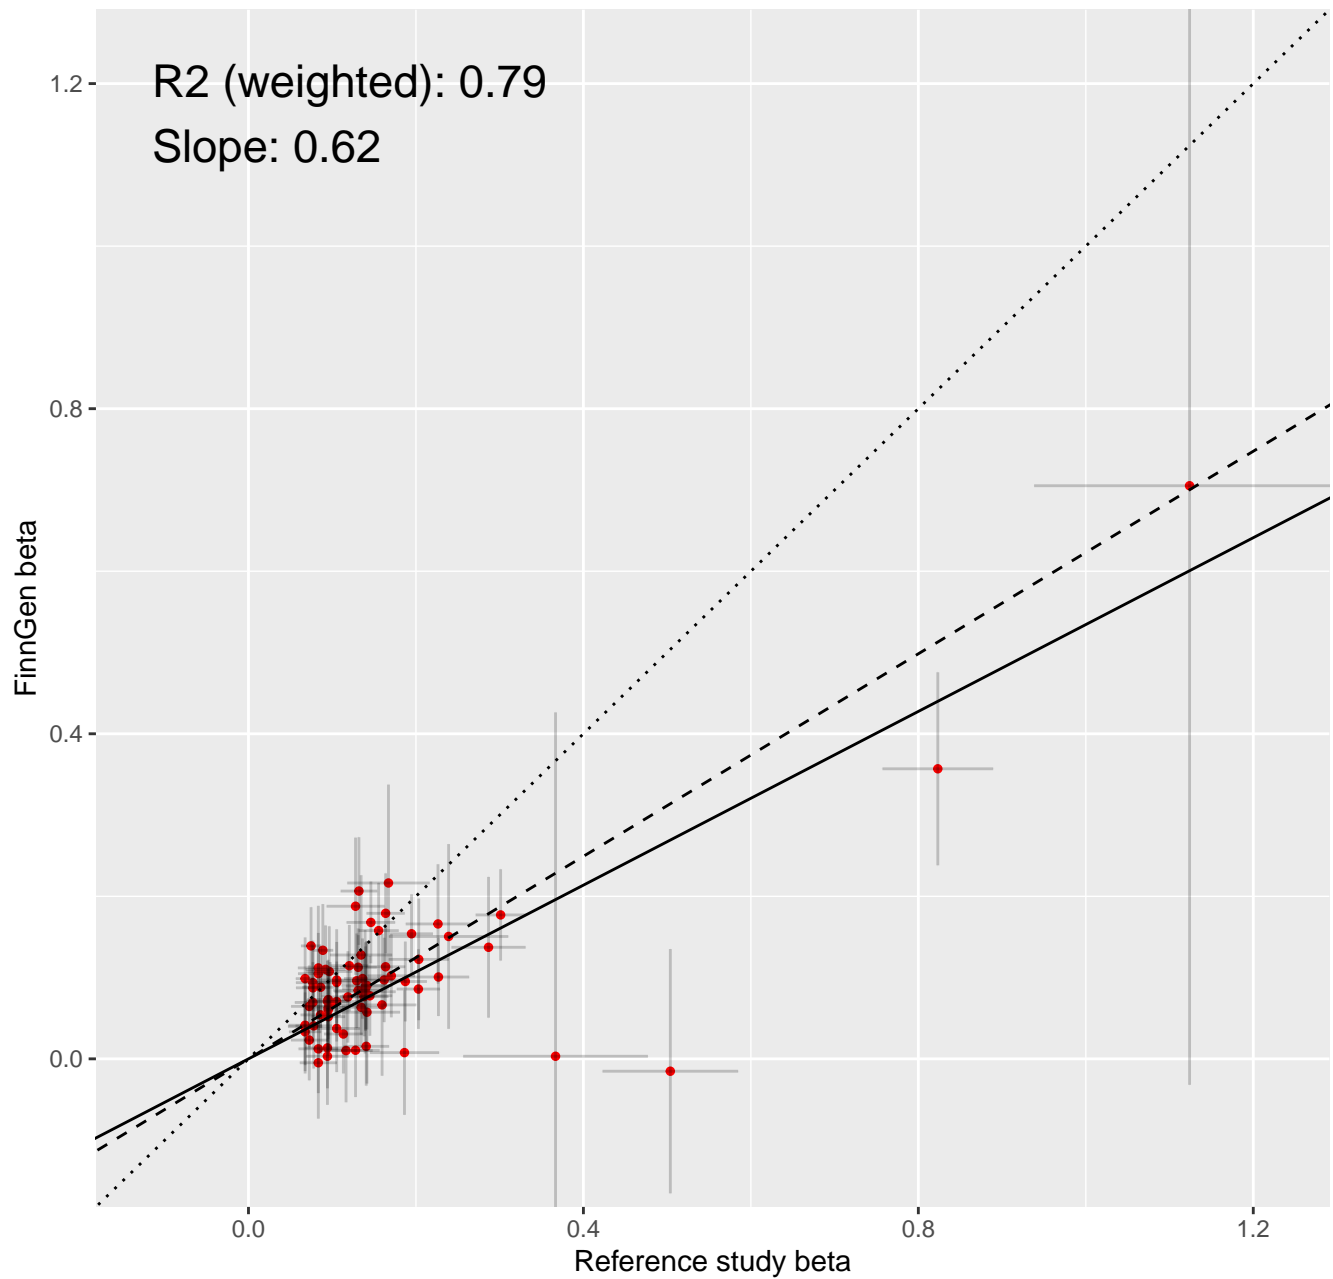

# J10\_ASTHMA

R2 (weighted): 0.93

Slope: 0.76

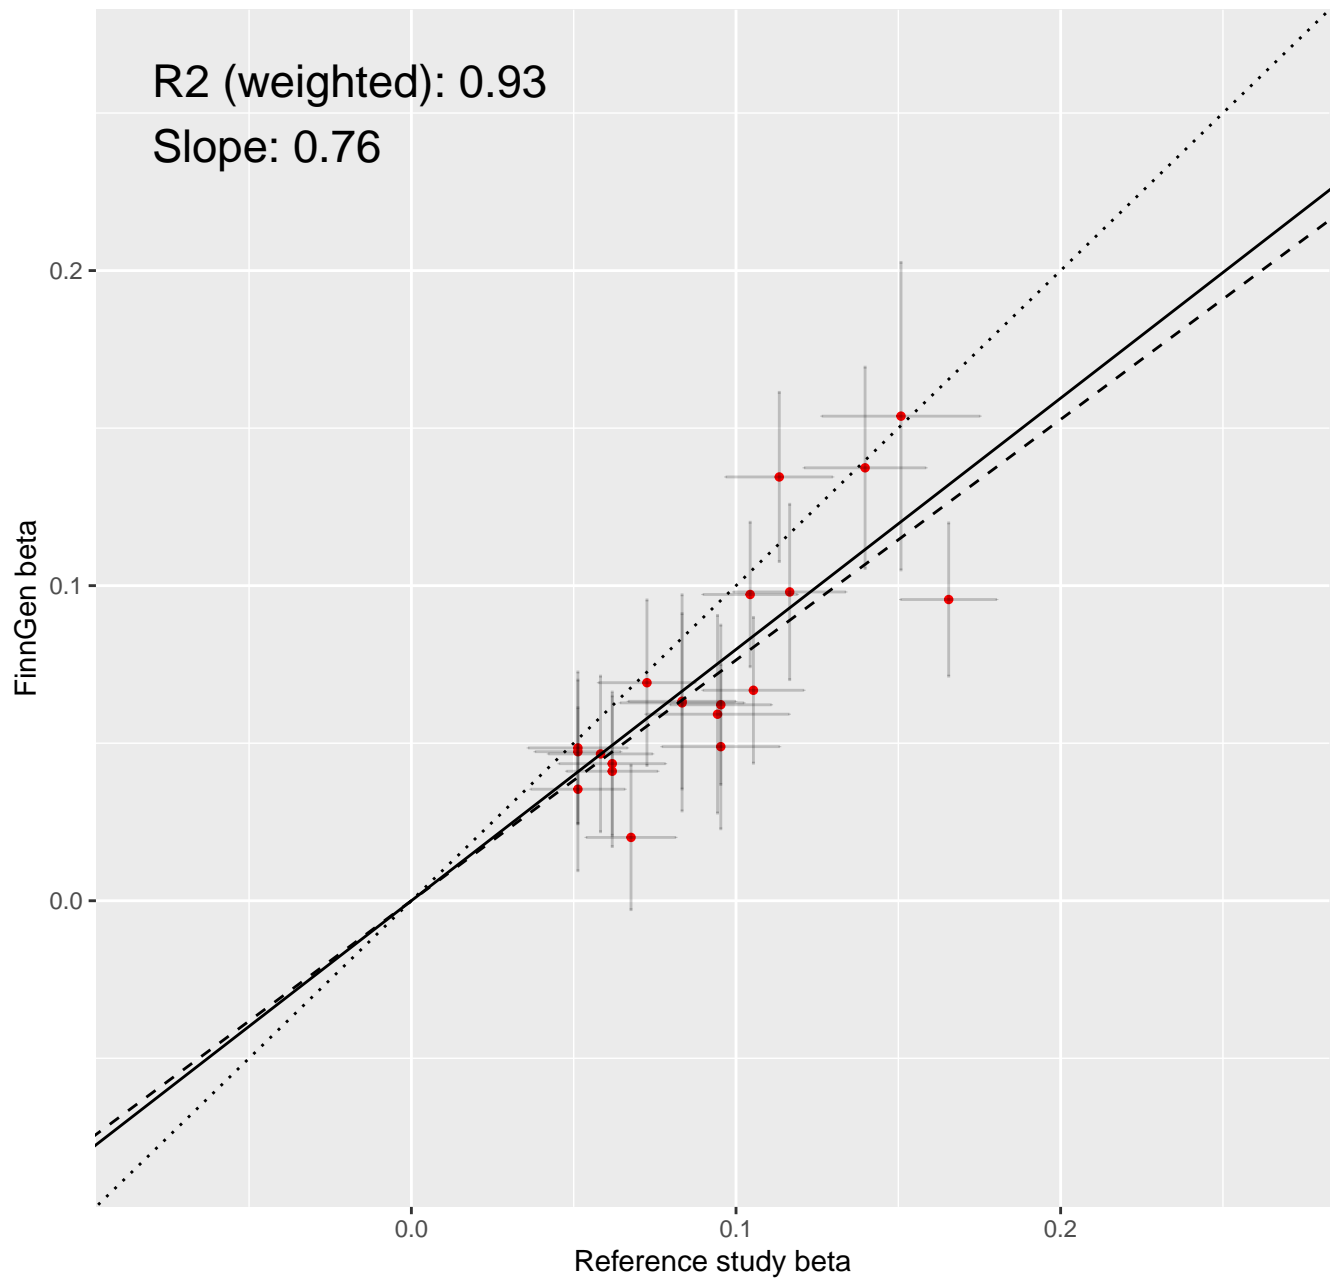

## L12\_ATOPIC

R2 (weighted): 0.91

Slope: 1.2

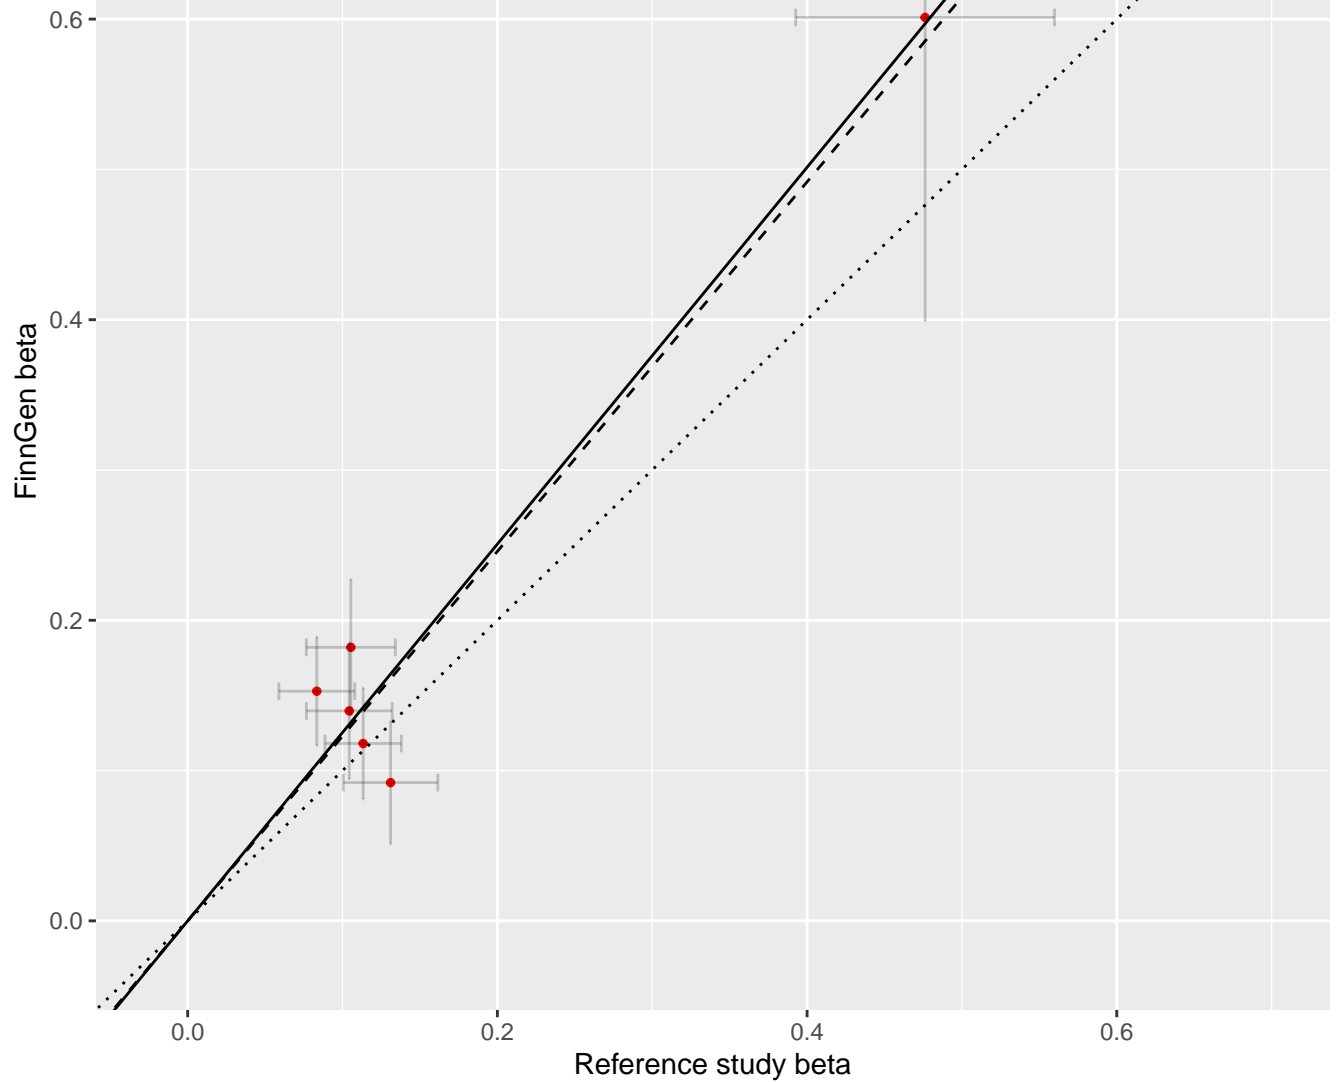

# L12\_PSORIASIS

R2 (weighted): 0.92

Slope: 0.67

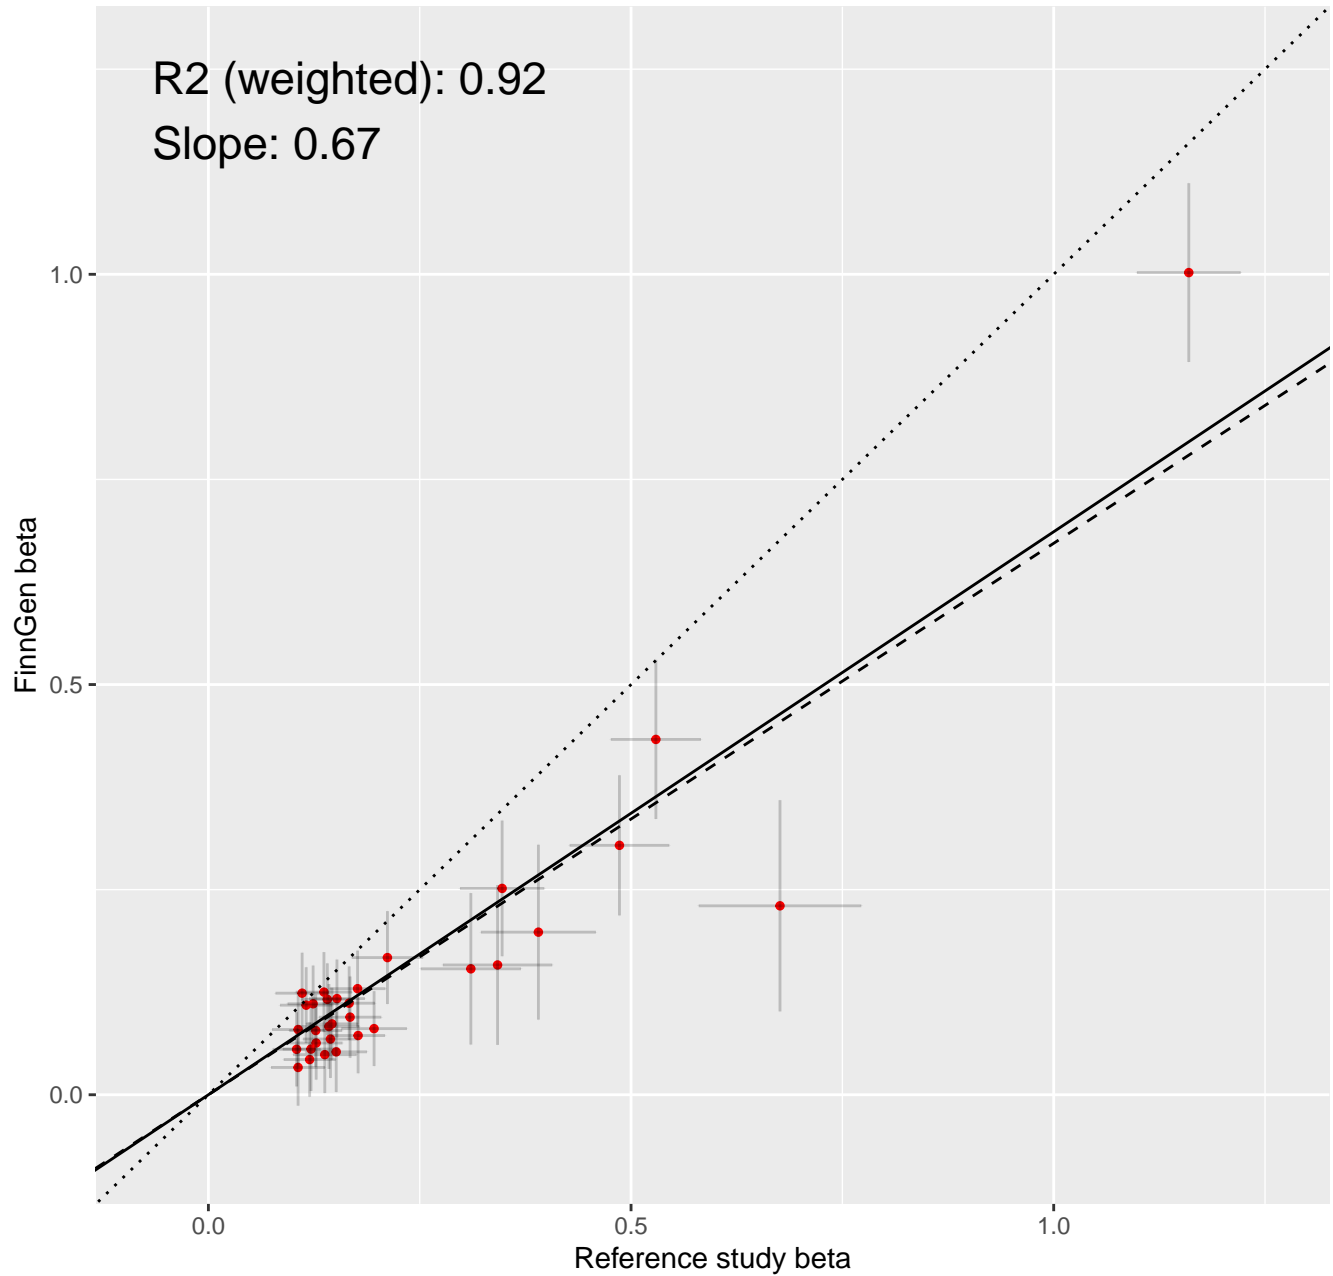

# M13\_ANKYLOSPON

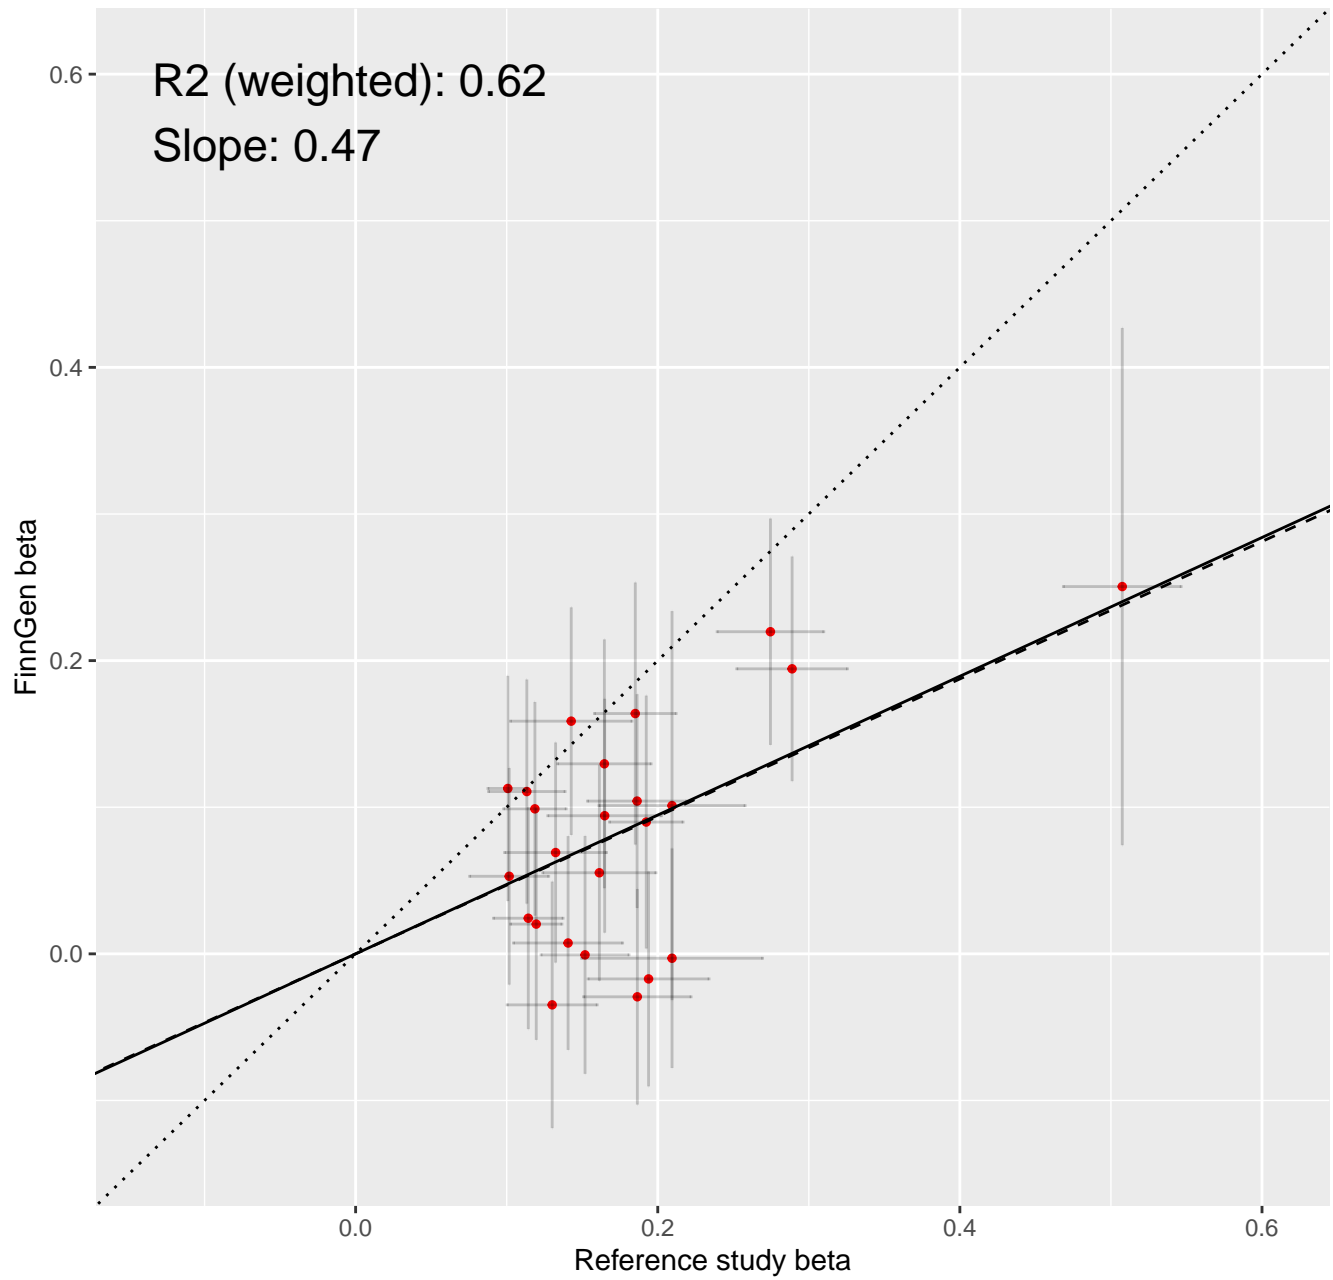

## RHEUMA\_SEROPOS

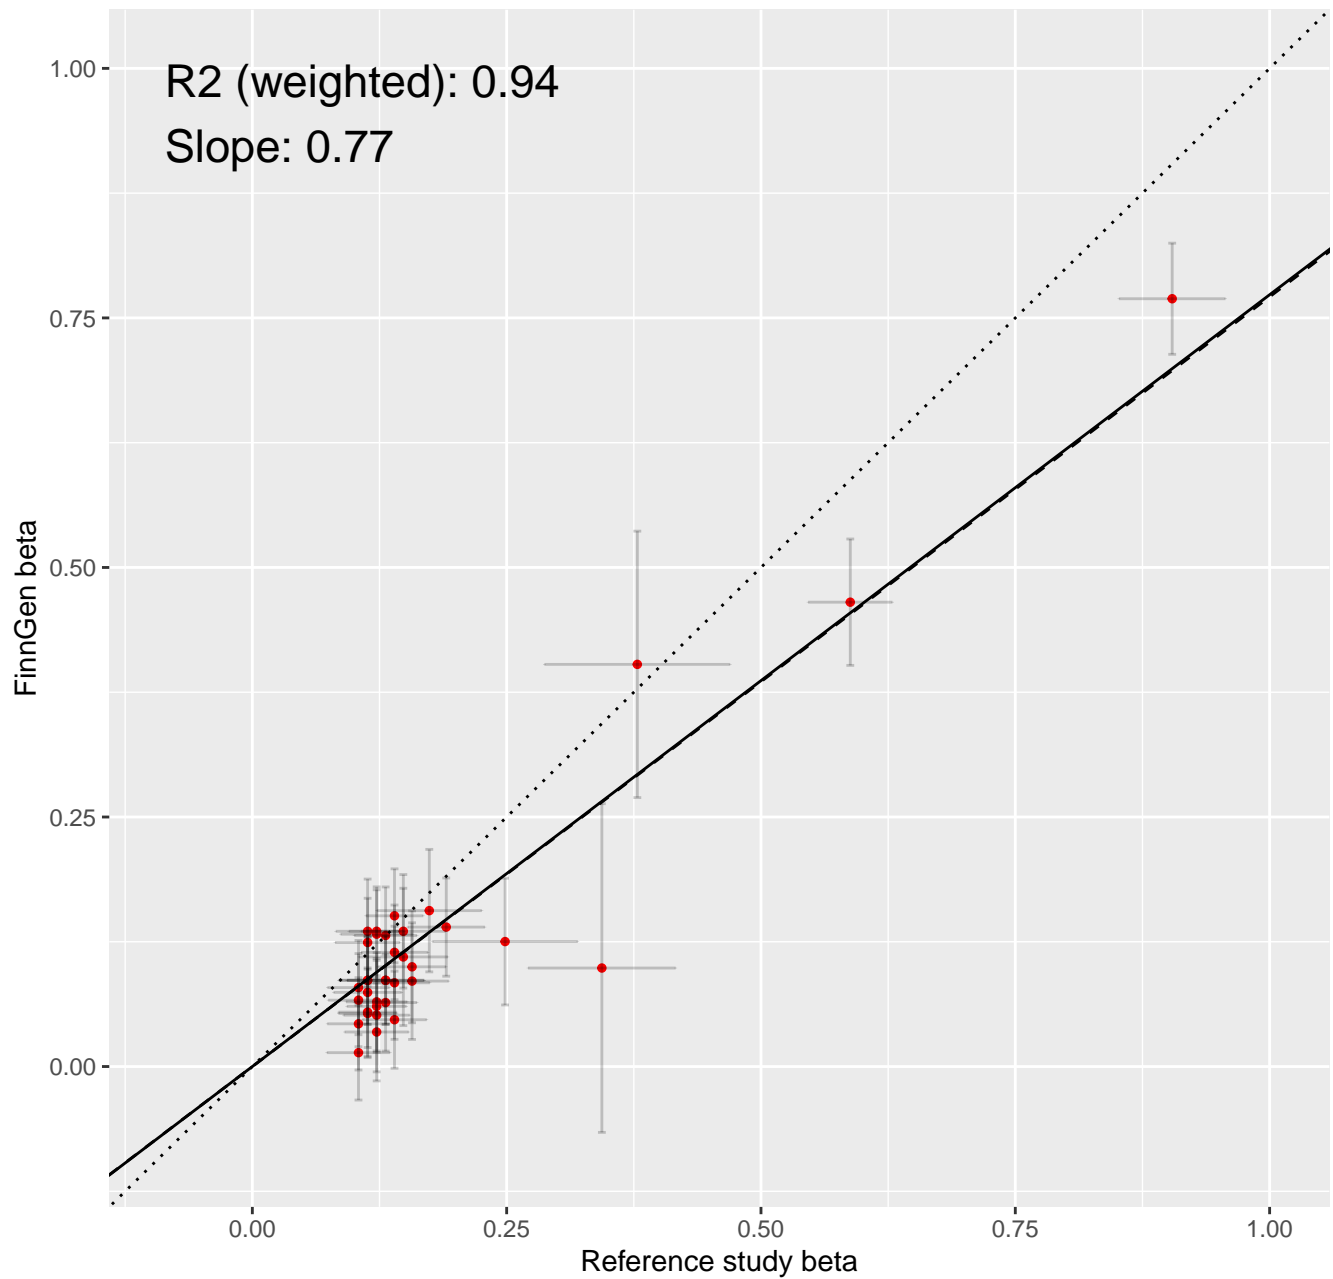

# T1D

R2 (weighted): 0.94

Slope: 0.73

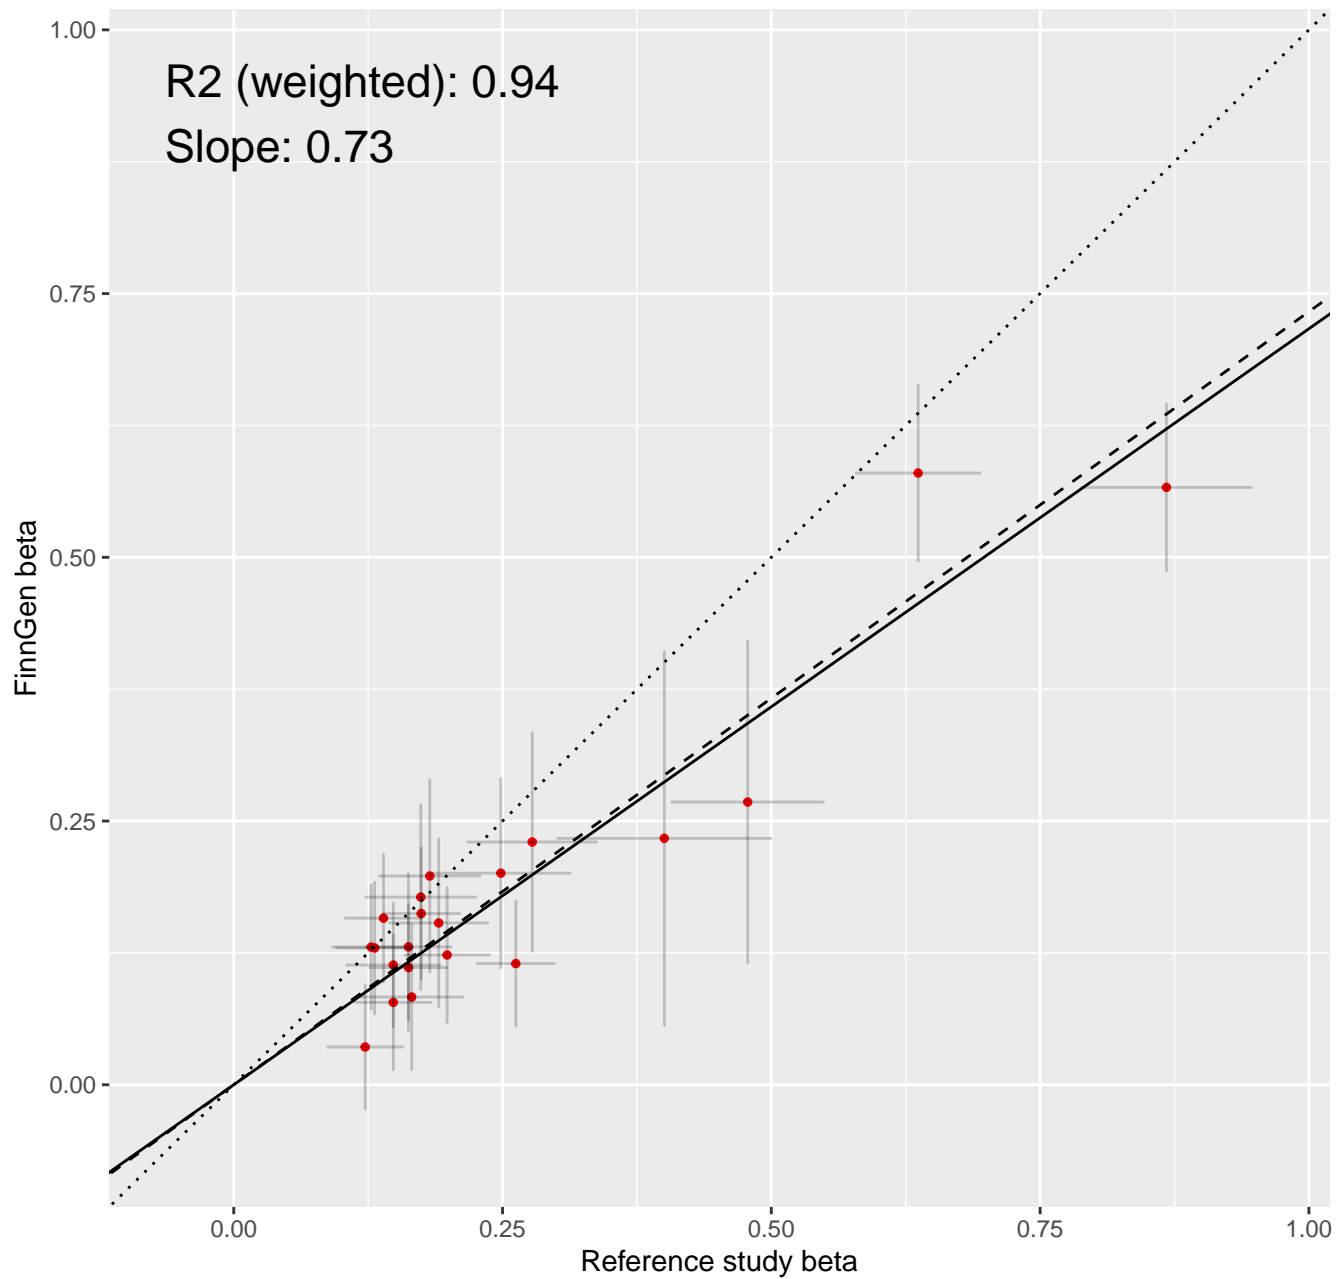

T2D

R2 (weighted): 0.89  
Slope: 0.81

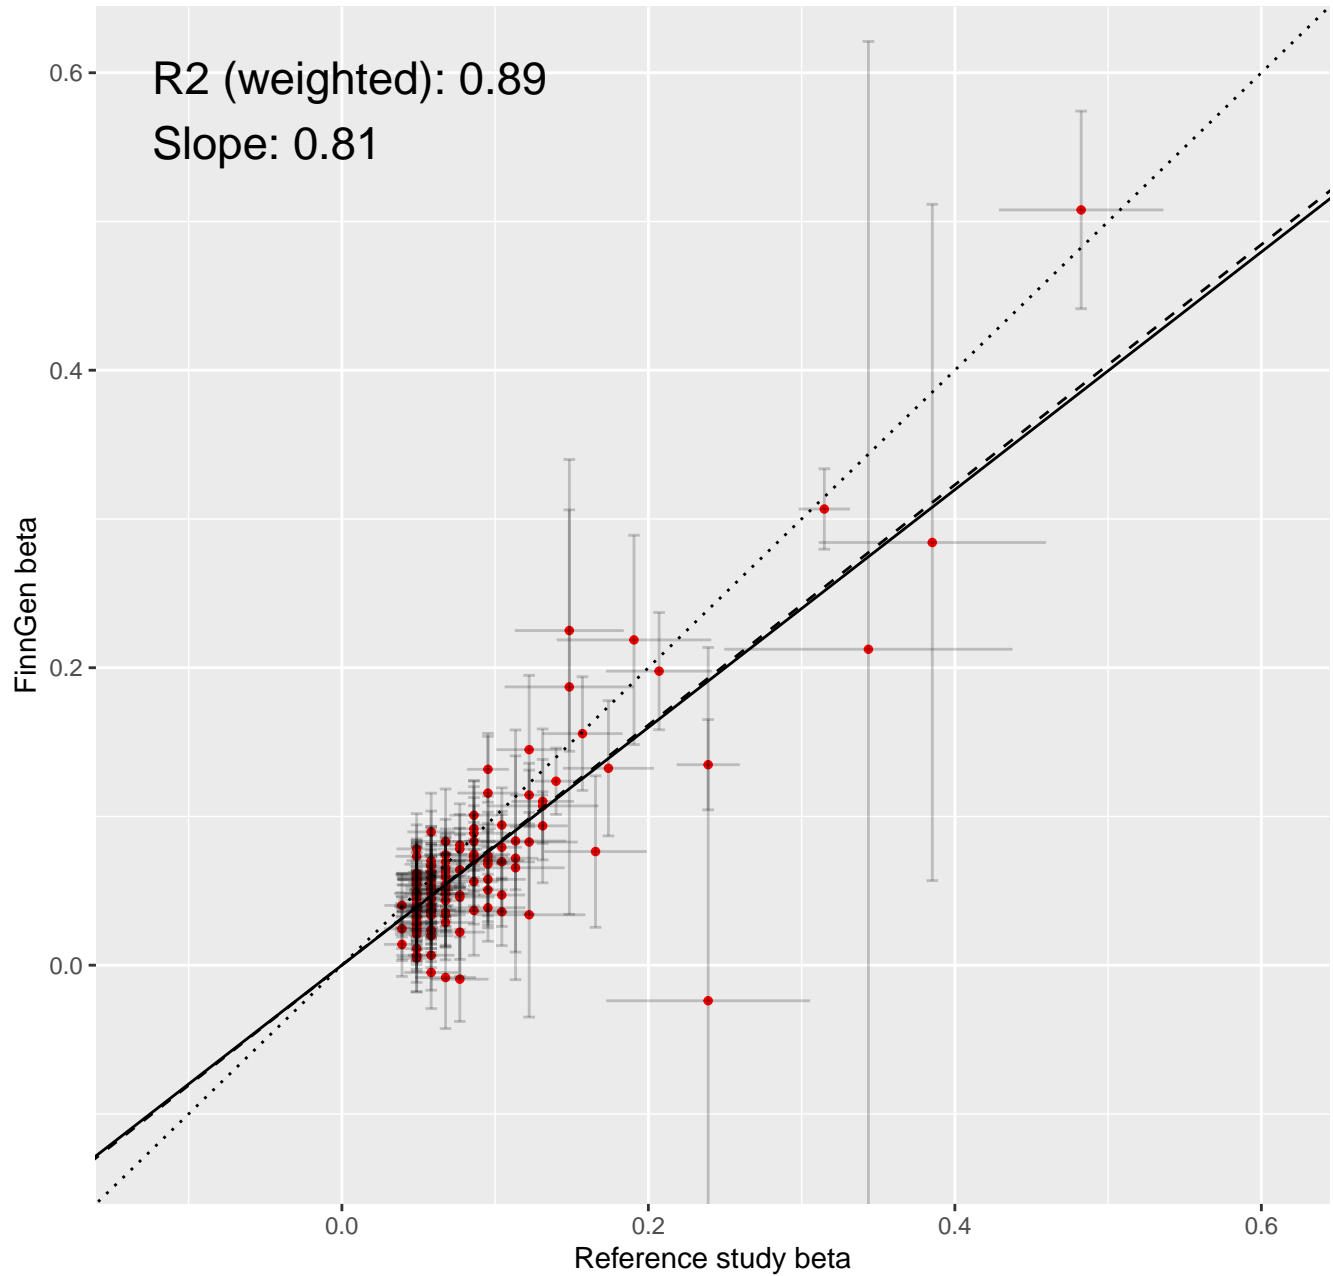

Supplement: 41586_2022_5473_MOESM1_ESM.pdf [file 41586_2022_5473_MOESM1_ESM.pdf]
